# Supplementary material
Source: Research Square preprint supplement (doi:10.21203/rs.3.rs-9516451/v1)
Supplement: Supplementary file 2 [file 527309a90c3c8bbe496c3563.docx]

***Defining cancer cases***

The cancer diagnosis was identified using coded variable cluster id *CAN_COD*.

***Snomed codes for variables***

OpenCode list, snomed CT browser, PCD refset Portal and the reference list of snomed codes on WISC platform were used to extract the relevant codes to identify the symptoms, specific blood tests, smoking and alcohol status. There are no specific codes for these types of symptoms hence clinical judgement was used to select the relevant codes but were not reviewed by a second clinician.

Blood tests

*Full blood count*

|  | **code** | **term** |
| --- | --- | --- |
|  | 61928009 | Platelet count |
|  | 1022651000000100 | Platelet count |
|  | 365632008 | Platelet count (finding) |
|  | 1022430000000105 | Haemoglobin estimation |
|  | 271026005 | Haemoglobin level estimation |
|  | 275806002 | Hb estimation |
|  | 1022540000000000 | Total white cell count |
|  | 391558003 | Total white blood count |
|  | 767002 | White blood cell count |
|  | 1110441000000100 | White blood cell count in blood |

*PSA*

|  | **code** | **term** |
| --- | --- | --- |
|  | 1000381000000105 | Serum prostate specific antigen level |
|  | 1006591000000104 | Total prostate specific antigen level |
|  | 1030791000000100 | Prostate specific antigen level |
|  | 909321000000105 | Prostate specific antigen measurement (procedure) |

*Hb A1c*

|  | **code** | **term** |
| --- | --- | --- |
|  | 1003671000000109 | Haemoglobin A1c level |
|  | 144176003 | Haemoglobin A1c level |
|  | 166902009 | Haemoglobin A1c level |
|  | 313835008 | Hemoglobin A1c measurement aligned to the Diabetes Control and Complications Trial |
|  | 365845005 | Hemoglobin A1C - diabetic control finding |
|  | 371981000000106 | Haemoglobin A1c measurement - International Federation of Clinical Chemistry and Laboratory Medicine standardised |
|  | 43396009 | Hemoglobin A1c measurement |
|  | 491841000000105 | Haemoglobin A1c level |
|  | 567641000000108 | Haemoglobin A1C - diabetic control NOS |
|  | 999791000000106 | Haemoglobin A1c level - International Federation of Clinical Chemistry and Laboratory Medicine standardised |
|  | 733830002 | Glycated hemoglobin-A1c |
|  | 259689004 | Glycosylated hemoglobin |
|  | 1013511000000100 | Total glycosylated haemoglobin level |

*Liver function tests*

|  | **code** | **term** |
| --- | --- | --- |
|  | 166610007 | Serum bilirubin measurement |
|  | 313840000 | Serum total bilirubin measurement |
|  | 999691000000104 | Serum bilirubin level |
|  | 997591000000109 | Serum total bilirubin level |
|  | 997561000000103 | Plasma total bilirubin level |
|  | 176271000119108 | Total bilirubin above reference range |
|  | 313951004 | Plasma total bilirubin measurement |
|  | 166612004 | Serum bilirubin above reference range |
|  | 26165005 | Bilirubin level above reference range |
|  | 365787000 | Finding of serum bilirubin level |
|  | 365786009 | Finding of bilirubin level |
|  | 1021751000000102 | Bilirubin profile |
|  | 1107231000000106 | Substance concentration of total bilirubin in plasma |
|  | 1107221000000109 | Substance concentration of total bilirubin in serum |
|  | 1000621000000100 | Serum alkaline phosphatase level |
|  | 271234008 | Serum alkaline phosphatase measurement |
|  | 88810008 | Alkaline phosphatase measurement |
|  | 104485008 | Albumin measurement, serum |
|  | 390955003 | Plasma albumin level (procedure) |
|  | 1000821000000103 | Serum albumin level (observable entity) |
|  | 1153477009 | Serum albumin below reference range (finding) |
|  | 390961000 | Plasma alanine aminotransferase level |
|  | 1018251000000100 | Serum alanine aminotransferase level |
|  | 201321000000108 | Serum alanine aminotransferase level |
|  | 1013211000000100 | Plasma alanine aminotransferase level |
|  | 104481004 | Alanine aminotransferase measurement, method with pyridoxal-5'-phosphate |
|  | 104482006 | Alanine aminotransferase measurement, method without pyridoxal-5'-phosphate |
|  | 201321000000108 | Serum alanine aminotransferase level |
|  | 219651000000107 | Serum alanine aminotransferase level |
|  | 219661000000105 | Serum alanine aminotransferase level |
|  | 250637003 | Alanine aminotransferase - blood measurement |
|  | 34608000 | Alanine aminotransferase measurement |
|  | 389586005 | Plasma alanine aminotransferase level |
|  | 390318006 | Plasma alanine aminotransferase level |
|  | 889391000000100 | Measurement of alanine transaminase activity |
|  | 250641004 | Aspartate aminotrasnferase |
|  | 45896001 | Aspartate aminotransferase measurement |
|  | 889441000000104 | Measurement of aspartate transaminase activity |
|  | 1000881000000102 | Serum aspartate aminotransferase level |
|  | 313852007 | Plasma aspartate transaminase measurement |
|  | 1000891000000100 | Plasma aspartate transaminase level |
|  | 373679006 | Aspartate transaminase level |
|  | 1106071000000102 | Enzyme activity of aspartate aminotransferase in serum |
|  | 1106681000000105 | Enzyme activity of aspartate aminotransferase in plasma |
|  | 166669000 | Aspartate aminotransferase serum level above reference range |
|  | 1031101000000102 | Aspartate aminotransferase level |

*Calcium*

|  | **code** | **term** |
| --- | --- | --- |
|  | 1000691000000104 | Serum calcium level |
|  | 271240001 | Serum calcium measurement |
|  | 443796007 | Corrected measurement of calcium |
|  | 390963002 | Plasma calcium level |
|  | 1027931000000101 | Blood calcium level |
|  | 390966005 | Plasma corrected calcium level |
|  | 252148000 | Calcium profile |
|  | 312472004 | Blood calcium measurement |
|  | 1017391000000108 | Plasma calcium level |
|  | 166702002 | Serum calcium level above reference range |

*Creatinine*

|  | **code** | **term** |
| --- | --- | --- |
|  | 1000730000000107 | Serum creatinine level |
|  | 113075003 | Creatinine measurement, serum |
|  | 313936008 | Plasma creatinine measurement |
|  | 365756002 | Finding of creatinine level |
|  | 365757006 | Finding of serum creatinine level |

*CA125*

|  | **code** | **term** |
| --- | --- | --- |
|  | 909121000000107 | Measurement of cancer antigen 125 in serum specimen |
|  | 1000461000000109 | Serum cancer antigen 125 level |
|  | 1027511000000100 | Cancer antigen 125 level |
|  | 80529009 | CA 125 measurement |
|  | 432519008 | Cancer antigen 125 above reference range (finding) |

*Ferritin*

|  | **code** | **term** |
| --- | --- | --- |
|  | 269821003 | Serum ferritin measurement (procedure) |
|  | 401152007 | Plasma ferritin measurement |
|  | 489004 | Ferritin measurement |
|  | 993381000000106 | Serum ferritin level (observable entity) |
|  | 992911000000107 | Plasma ferritin level (observable entity) |

*ESR*

|  | **code** | **term** |
| --- | --- | --- |
|  | 416838001 | Erythrocyte sedimentation rate measurement |
|  | 1022511000000103 | Erythrocyte sedimentation rate |
|  | 165468009 | Erythrocyte sedimentation rate above reference range |
|  | 365649001 | Finding of erythrocyte sedimentation rate |

*CRP*

|  | **code** | **term** |
| --- | --- | --- |
|  | 135842001 | Serum C reactive protein level |
|  | 1001371000000100 | Serum C reactive protein level |
|  | 999651000000107 | Plasma C reactive protein (observable entity) |
|  | 270980008 | Plasma C-reactive protein measurement |
|  | 55235003 | C-reactive protein measurement |
|  | 119971000119104 | C-reactive protein above reference range |
|  | 711357009 | Measurement of C-reactive protein using high sensitivity technique |

Symptoms

*Weight loss and loss of appetite*

|  | **code** | **term** |
| --- | --- | --- |
|  | 139082003 | Appetite loss: [anorexia] or [anorexia symptom] |
|  | 139091004 | Weight loss (& abnormal) |
|  | 158268008 | [D]Anorexia |
|  | 158269000 | [D]Appetite loss |
|  | 158272007 | [D]Anorexia NOS |
|  | 161826006 | Appetite loss: [anorexia] or [anorexia symptom] |
|  | 161832001 | Weight decreasing |
|  | 161834000 | Abnormal weight loss (& [symptom]) |
|  | 192017004 | Non-organic loss of appetite |
|  | 198511000000103 | Complaining of weight loss |
|  | 206915006 | [D]Anorexia |
|  | 206916007 | [D]Appetite loss |
|  | 206917003 | [D]Anorexia NOS |
|  | 213791000000109 | Complaining of weight loss |
|  | 213801000000108 | Complaining of weight loss |
|  | 240261000000105 | Recent weight loss |
|  | 249468005 | Anorexia symptom |
|  | 249469002 | No interest in food |
|  | 249471002 | Loss of appetite - symptom |
|  | 267024001 | Abnormal weight loss |
|  | 267158006 | Weight loss (& abnormal) |
|  | 269813009 | Appetite loss - anorexia |
|  | 271816004 | Lack of appetite |
|  | 309257005 | Excessive weight loss |
|  | 363806002 | Weight loss (amount) |
|  | 39161000000101 | Decrease in appetite |
|  | 401003006 | Weight loss from baseline weight |
|  | 41421000000102 | Decrease in appetite |
|  | 422868009 | Unexplained weight loss |
|  | 426977000 | Recent weight loss |
|  | 432541000000106 | [D]Anorexia NOS |
|  | 448765001 | Unintentional weight loss |
|  | 451151000000109 | [D]Anorexia NOS |
|  | 46641000000101 | Decrease in appetite |
|  | 496871000000107 | [D]Anorexia |
|  | 496881000000109 | [D]Appetite loss |
|  | 511461000000103 | Unexplained weight loss |
|  | 60861008 | Excessive body weight loss |
|  | 64379006 | Decrease in appetite |
|  | 699205002 | Involuntary weight loss |
|  | 75071000000109 | Weight loss from baseline weight |
|  | 768571000000103 | Unintentional weight loss |
|  | 768581000000101 | Unintentional weight loss |
|  | 78901000000106 | Decrease in appetite |
|  | 79311000000104 | Weight loss from baseline weight |
|  | 79890006 | Loss of appetite |
|  | 816160009 | Measured weight loss |
|  | 89362005 | Weight loss |

*Fatigue/malaise*

|  | **code** | **term** |
| --- | --- | --- |
|  | 123087006 | Sluggishness |
|  | 13791008 | Asthenia |
|  | 139124002 | [Tiredness], [fatigue], [lethargy] or [malaise] symptom |
|  | 139126000 | Fatigue |
|  | 139127009 | Tired all the time |
|  | 139131003 | Tiredness symptom NOS |
|  | 139512001 | Weakness present |
|  | 158167007 | [D]Malaise and fatigue |
|  | 158169005 | [D]Fatigue |
|  | 158170006 | Asthenia [D] |
|  | 158171005 | [D]Lethargy |
|  | 158173008 | [D]Malaise and fatigue NOS |
|  | 161868006 | ([Tiredness] or [fatigue] or [lethargy] or [malaise] symptom) or (C/O "muzzy head") |
|  | 161870002 | Tired all the time (& [C/O -]) |
|  | 161875007 | Tiredness symptom NOS |
|  | 206765009 | [D]Malaise and fatigue |
|  | 206767001 | [D]Fatigue |
|  | 206768006 | [D]Asthenia NOS |
|  | 206769003 | [D]Lethargy |
|  | 206771003 | [D]Tiredness |
|  | 206773000 | [D]Malaise and fatigue NOS |
|  | 214264003 | Lethargy |
|  | 224960004 | Tired |
|  | 248268002 | Tires quickly |
|  | 248269005 | Tired on least exertion |
|  | 248270006 | Quickly exhausted |
|  | 248271005 | Exhausted on least exertion |
|  | 248274002 | Lack of energy |
|  | 248275001 | Lack of vitality |
|  | 248278004 | Attacks of weakness |
|  | 267031002 | Tiredness symptom |
|  | 267032009 | Tired all the time |
|  | 267033004 | Malaise/lethargy |
|  | 267160008 | [Tiredness], [fatigue], [lethargy] or [malaise] symptom |
|  | 271795006 | Malaise and fatigue |
|  | 271797003 | Lethargy |
|  | 272036004 | Complaining of debility and malaise |
|  | 272060000 | Fatigue - symptom |
|  | 272062008 | Complaining of "tired all the time" |
|  | 274236006 | [D]Asthenia |
|  | 274638001 | Asthenia |
|  | 279123003 | Exhausting |
|  | 302758002 | Tiredness |
|  | 314109004 | Feeling tired |
|  | 366947008 | Exhaustion |
|  | 367172001 | Exhaustion |
|  | 367392001 | Lacking in energy |
|  | 414631000000100 | [D]Malaise and fatigue NOS |
|  | 439201000000104 | [D]Asthenia NOS |
|  | 463761000000103 | [D]Malaise and fatigue NOS |
|  | 495751000000103 | [D]Malaise and fatigue |
|  | 495771000000107 | [D]Fatigue |
|  | 495781000000109 | [D]Lethargy |
|  | 495801000000105 | [D]Tiredness |
|  | 502201000000109 | [D]Asthenia |
|  | 508581000000104 | Post-exertional fatigue |
|  | 52663000 | Lethargy |
|  | 580521000000101 | Tiredness symptom NOS |
|  | 60119000 | Exhaustion |
|  | 713568000 | Occasionally tired |
|  | 84229001 | Fatigue |
|  | 84946008 | Extreme exhaustion |

*Abdominal symptoms*

|  | **code** | **term** |
| --- | --- | --- |
|  | 136571000119109 | Adult colic |
|  | 275297005 | Diarrhea and vomiting, symptom (finding) |
|  | 271864008 | Mucus in stool (finding) |
|  | 271860004 | Abdominal mass(finding) |
|  | 271681002 | Stomach ache (finding) |
|  | 271352005 | Bilious vomit |
|  | 314212008 | Abdominal pain - cause unknown (finding) |
|  | 439469002 | Recurrent abdominal pain (finding) |
|  | 9991008 | Abdominal colic |
|  | 304542004 | Nonspecific abdominal pain (finding) |
|  | 300359004 | Finding of vomiting (finding) |
|  | 300306001 | Stomach problem (finding) |
|  | 285388000 | Right sided abdominal pain (finding) |
|  | 285387005 | Left sided abdominal pain (finding) |
|  | 371102005 | Generalized colicky abdominal pain (finding) |
|  | 21522001 | Abdominal pain (finding) |
|  | 248490000 | Bloating symptom (finding) |
|  | 422587007 | Nausea (finding) |
|  | 398032003 | Loose stool (finding) |
|  | 236070005 | Simple constipation (finding) |
|  | 301790009 | Vomited meal (finding) |
|  | 102614006 | Generalized abdominal pain (finding) |
|  | 162038003 | Non-colicky abdominal pain (finding) |
|  | 119416008 | Epigastric discomfort (finding) |
|  | 371094000 | Colicky hypogastric pain (finding) |
|  | 405729008 | Hematochezia (finding) |
|  | 308903002 | On examination - epigastric pain on palpation (finding) |
|  | 268941000 | On examination - abdominal pain on palpation (finding) |
|  | 225587003 | Gastric reflux (finding) |
|  | 79922009 | Epigastric pain (finding) |
|  | 37389005 | Biliary colic (finding) |
|  | 43364001 | Abdominal discomfort (finding) |
|  | 51197009 | Stomach cramps (finding) |
|  | 54586004 | Lower abdominal pain (finding) |
|  | 60728008 | Swollen abdomen (finding) |
|  | 62315008 | Diarrhea (finding) |
|  | 162068007 | Abdominal distension symptom (finding) |
|  | 162059005 | Upset stomach (finding) |
|  | 162046002 | Central abdominal pain (finding) |
|  | 116289008 | Abdominal bloating (finding) |
|  | 83132003 | Upper abdominal pain (finding) |
|  | 71820002 | Urgent desire for stool (finding) |
|  | 268941000 | On examination - abdominal pain on palpation (finding) |
|  | 267060006 | Diarrhea symptom (finding) |
|  | 249519007 | Diarrhea and vomiting (finding) |
|  | 249497008 | Vomiting symptom (finding) |
|  | 249517009 | Constipation alternates with diarrhea (finding) |

*Chest symptoms*

|  | **code** | **term** |
| --- | --- | --- |
|  | 315246003 | Unexplained cough (finding) |
|  | 29857009 | Chest pain (finding) |
|  | 49727002 | Cough (finding) |
|  | 267036007 | Dyspnea (finding) |
|  | 68154008 | Chronic cough (finding) |
|  | 28743005 | Productive cough (finding) |
|  | 11833005 | Dry cough (finding) |
|  | 60845006 | Dyspnea on exertion (finding) |
|  | 102589003 | Atypical chest pain (finding) |
|  | 161923004 | Productive cough-clear sputum (finding) |
|  | 161929000 | Chesty cough (finding) |
|  | 161925006 | Productive cough-yellow sputum (finding) |
|  | 161924005 | Productive cough -green sputum (finding) |
|  | 102588006 | Chest wall pain (finding) |
|  | 274668005 | Non-cardiac chest pain (finding) |
|  | 272039006 | Complaining of cough (finding) |
|  | 248604008 | Clear sputum (finding) |
|  | 248596009 | Sputum - symptom (finding) |
|  | 161947006 | Nocturnal cough and wheeze (finding) |
|  | 161941007 | Dyspnea at rest (finding) |
|  | 161940008 | Dyspnea on mild exertion (finding) |
|  | 161939006 | Dyspnea on moderate exertion (finding) |
|  | 281245003 | Musculoskeletal chest pain (finding) |
|  | 279084009 | Chest discomfort (finding) |
|  | 277908001 | Green sputum (finding) |
|  | 277907006 | Yellow sputum (finding) |
|  | 391123006 | Medical Research Council Dyspnoea scale grade 2 (finding) |
|  | 391120009 | Medical Research Council Dyspnoea scale grade 1 (finding) |
|  | 390871002 | Dyspnea on strenuous exertion (finding) |
|  | 284523002 | Persistent cough (finding) |
|  | 7142008 | Cough at rest (finding) |
|  | 870535009 | Chronic dyspnea (finding) |
|  | 73322006 | Dyspnea, class IV (finding) |
|  | 81953000 | Chest pain on exertion (finding) |
|  | 11833005 | Dry cough (finding) |
|  | 39950000 | Dyspnea, class III (finding) |
|  | 72365000 | Dyspnea, class II (finding) |
|  | 17216000 | Dyspnea, class I (finding) |
|  | 1090011000000104 | Extended Medical Research Council dyspnoea scale grade 4 (finding) |
|  | 1090021000000105 | Extended Medical Research Council dyspnoea scale grade 5b (finding) |
|  | 1090001000000101 | Extended Medical Research Council dyspnoea scale grade 5a (finding) |
|  | 1089991000000100 | Extended Medical Research Council dyspnoea scale grade 3 (finding) |
|  | 1089981000000102 | Extended Medical Research Council dyspnoea scale grade 2 (finding) |
|  | 1089971000000104 | Extended Medical Research Council dyspnoea scale grade 1 (finding) |
|  | 297216006 | Increasing breathlessness (finding) |
|  | 810511000000109 | Episodic dry cough (finding) |
|  | 391126003 | Medical Research Council Dyspnoea scale grade 5 (finding) |
|  | 391125004 | Medical Research Council Dyspnoea scale grade 4 (finding) |
|  | 391124000 | Medical Research Council Dyspnoea scale grade 3 (finding) |
|  | 297217002 | Rib pain (finding) |
|  | 81953000 | Chest pain on exertion (finding) |
|  | 102587001 | Acute chest pain (finding) |

*Pain other than abdominal and chest*

|  | **code** | **term** |
| --- | --- | --- |
|  | 10601006 | Pain in lower limb |
|  | 81680005 | Neck pain (nonspecific) |
|  | 22253000 | Pain (finding) — general “pain” concept |
|  | 30989003 | Knee pain (finding) |
|  | 45326000 | Shoulder pain (finding) |
|  | 162397003 | Pain in throat (finding) |
|  | 279039007 | Low back pain (finding) |
|  | 4568003 | Retrosternal pain (finding) |
|  | 161891005 | backache |
|  | 30473006 | Pain in pelvis |
|  | 279069000 | Musculoskeletal pain(finding) |
|  | 771083005 | Pain in upper arm (finding) |
|  | 82423001 | Chronic pain (finding) |
|  | 1003721002 | Pain of joint of knee (finding) |
|  | 82991003 | Generalized aches and pains (finding) |
|  | 49218002 | Pain of hip region (finding) |
|  | 56608008 | Pain of wrist region (finding) |
|  | 25064002 | Headache (finding) |
|  | 102570003 | Inguinal pain (finding) |
|  | 47933007 | Foot pain (finding) |
|  | 52598005 | Rest pain (finding) |
|  | 95668009 | Pain in face (finding) |
|  | 74323005 | Pain of elbow region (finding) |
|  | 161894002 | Complaining of low back pain (finding) |
|  | 53430007 | Pain of breast (finding) |
|  | 267949000 | Shoulder joint pain |
|  | 57676002 | Pain of joint (finding) |
|  | 162299003 | Generalized headache (finding) |
|  | 247373008 | Ankle pain (finding) |
|  | 247366003 | Acute back pain with sciatica (finding) |
|  | 278860009 | Chronic low back pain (finding) |
|  | 53057004 | Hand pain (finding) |
|  | 162052001 | Left iliac fossa pain (finding) |
|  | 267104002 | Complaining of a pain (finding) |
|  | 30233002 | Swallowing painful (finding) |
|  | 279040009 | Mechanical low back pain (finding) |
|  | 239733006 | Anterior knee pain (finding) |
|  | 305799001 | Seen by pain management service (finding) |
|  | 34789001 | Pain in coccyx (finding) |
|  | 274306004 | On examination - frontal sinus pain (finding) |
|  | 310483003 | Complaining of pain in toe (finding) |
|  | 300955002 | Pain in thumb (finding) |
|  | 314642004 | Intermittent pain (finding) |
|  | 78514002 | Thigh pain (finding) |
|  | 2237002 | Pleuritic pain (finding) |
|  | 102556003 | Pain in upper limb (finding) |
|  | 272047006 | Complaining of loin pain (finding) |
|  | 1003722009 | Pain of knee region (finding) |
|  | 68962001 | Muscle pain (finding) |
|  | 287046004 | Pain in right arm (finding) |
|  | 279038004 | Thoracic back pain (finding) |
|  | 27355003 | Toothache (finding) |
|  | 12584003 | Bone pain (finding) |
|  | 202480001 | Pain of joint of elbow (finding) |
|  | 90834002 | Pain in limb (finding) |
|  | 41652007 | Pain in eye (finding) |
|  | 35678005 | Pain of multiple joints (finding) |
|  | 298012000 | Wound pain (finding) |
|  | 281245003 | Musculoskeletal chest pain (finding) |
|  | 202480001 | Pain of joint of elbow (finding) |
|  | 8708008 | Sharp pain (finding) |
|  | 2733002 | Heel pain (finding) |
|  | 48926009 | Pain in spine (finding) |
|  | 162359003 | Bilateral earache (finding) |
|  | 279093005 | Cramping pain (finding) |
|  | 279021003 | Epididymal pain (finding) |
|  | 36729000 | Pain of prostate (finding) |
|  | 103014001 | Cervical nerve root pain (finding) |
|  | 20502007 | Pain in scrotum (finding) |
|  | 279029001 | Pain in cervical spine (finding) |
|  | 275896009 | On examination - pain (finding) |
|  | 63901009 | Pain in testicle (finding) |
|  | 161896000 | Complaining of upper back ache (finding) |
|  | 162356005 | Earache symptom (finding) |
|  | 134407002 | Chronic back pain (finding) |
|  | 202490009 | Pain of joint of ankle (finding) |
|  | 29695002 | Throbbing pain (finding) |
|  | 239166000 | Persistent wound pain (finding) |
|  | 267982002 | Pain in lumbar spine (finding) |
|  | 268994009 | On examination - tenderness/pain (finding) |
|  | 59139008 | Crushing chest pain (finding) |
|  | 49575005 | Shooting pain (finding) |
|  | 162053006 | Suprapubic pain (finding) |
|  | 162050009 | Right flank pain (finding) |
|  | 287045000 | Pain in left arm (finding) |
|  | 426702003 | Pain in female pelvis (finding) |
|  | 267096005 | Frontal headache (finding) |
|  | 202487003 | Pain of sacroiliac joint (finding) |
|  | 300954003 | Pain in calf (finding) |
|  | 274663001 | Acute pain (finding) |
|  | 285365001 | Pain in toe (finding) |
|  | 314716005 | Acute pelvic pain(finding) |
|  | 1088071000000108 | Pain in upper arm (finding) |
|  | 41413006 | Temporal headache (finding) |
|  | 4969004 | Sinus headache (finding) |
|  | 301715003 | Left upper quadrant pain (finding) |
|  | 162051008 | Right iliac fossa pain (finding) |
|  | 247398009 | Neuropathic pain (finding) |
|  | 68653001 | Anal pain (finding) |
|  | 287048003 | Pain in right lower limb (finding) |
|  | 162147009 | Complaining of pelvic pain (finding) |
|  | 278862001 | Acute low back pain (finding) |
|  | 301717006 | Right upper quadrant pain (finding) |
|  | 36349006 | Burning pain (finding) |
|  | 38343000 | Vaginal pain (finding) |
|  | 202482009 | Pain of joint of wrist (finding) |
|  | 426206001 | Constant pain (finding) |
|  | 279043006 | Pain in buttock (finding) |
|  | 279981003 | Peripheral neuropathic pain (finding) |
|  | 330007 | Occipital headache (finding) |
|  | 267981009 | Pain in thoracic spine (finding) |
|  | 299308007 | Hip joint painful on movement (finding) |
|  | 18876004 | Pain in finger (finding) |
|  | 279035001 | Acute thoracic back pain (finding) |
|  | 247369005 | Pain of vertebral joint (finding) |
|  | 16844001 | Painful urging to urinate (finding) |
|  | 58250006 | Scalding pain on urination (finding) |
|  | 414992000 | Painless rectal bleeding (finding) |
|  | 271857006 | Loin pain (finding) |
|  | 77880009 | Rectal pain (finding) |
|  | 102631004 | Pain due to disorder of pancreas (finding) |
|  | 202472008 | Pain of joint of hand (finding) |
|  | 307225003 | Perianal pain (finding) |
|  | 305745006 | Seen by pain management nurse (finding) |
|  | 11679003 | Radicular pain (finding) |
|  | 299112005 | Finger joint painful on movement (finding) |
|  | 279083003 | Discomfort in mouth (finding) |
|  | 274667000 | Jaw pain (finding) |
|  | 287047008 | Pain in left lower limb (finding) |
|  | 247347003 | Discomfort (finding) |
|  | 298857005 | Shoulder joint painful on movement (finding) |
|  | 711511000000102 | Pain relieved by lowering leg (finding) |
|  | 449884001 | Pain of scar (finding) |

*Unprovoked deep vein thrombosis*

|  | **code** | **term** |
| --- | --- | --- |
| 1. | 978421000000101 | Unprovoked DVT(disorder) |
| 2. | 978431000000104 | Unprovoked deep vein thrombosis |

Clinical features

*Smoking*

|  | **code** | **term** |
| --- | --- | --- |
|  | 160619003 | Rolls own cigarettes (finding) |
|  | 266919005 | Never smoked tobacco (finding) |
|  | 160620009 | Ex-pipe smoker (finding) |
|  | 266925009 | Ex-very heavy cigarette smoker (40+/day) (finding) |
|  | 230065006 | Chain smoker (finding) |
|  | 230059006 | Occasional cigarette smoker (finding) |
|  | 230060001 | Light cigarette smoker (finding) |
|  | 230063004 | Heavy cigarette smoker (finding) |
|  | 160603005 | Light cigarette smoker (1-9 cigs/day) (finding) |
|  | 8392000 | Non-smoker (finding) |
|  | 517211000000106 | Recently stopped smoking (finding) |
|  | 428041000124106 | Occasional tobacco smoker (finding) |
|  | 160604004 | Moderate cigarette smoker (10-19 cigs/day) (finding) |
|  | 266923002 | Ex-moderate cigarette smoker (10-19/day) (finding) |
|  | 266922007 | Ex-light cigarette smoker (1-9/day) (finding) |
|  | 160605003 | Heavy cigarette smoker (20-39 cigs/day) (finding) |
|  | 266920004 | Trivial cigarette smoker (less than one cigarette/day) (finding) |
|  | 59978006 | Cigar smoker (finding) |
|  | 492191000000103 | Ex roll-up cigarette smoker (finding) |
|  | 230062009 | Moderate cigarette smoker (finding) |
|  | 230064005 | Very heavy cigarette smoker (finding) |
|  | 82302008 | Pipe smoker (finding) |
|  | 8517006 | Ex-smoker (finding) |
|  | 160606002 | Very heavy cigarette smoker (40+ cigs/day) (finding) |
|  | 266924008 | Ex-heavy cigarette smoker (20-39/day) (finding) |
|  | 65568007 | Cigarette smoker (finding) |
|  | 266921000 | Ex-trivial cigarette smoker (<1/day) (finding) |
|  | 266928006 | Ex-cigarette smoker amount unknown (finding) |
|  | 281018007 | Ex-cigarette smoker (finding) |
|  | 160618006 | Current non-smoker (finding) |
|  | 160621008 | Ex-cigar smoker (finding) |
|  | 77176002 | Smoker (finding) |
|  | 160617001 | Stopped smoking (finding) |
|  | 1092071000000100 | Ex-heavy smoker (20-39/day) (finding) |
|  | 360918006 | Aggressive non-smoker (finding) |
|  | 56771006 | Heavy smoker (over 20 per day) (finding) |
|  | 1092091000000100 | Ex-moderate smoker (10-19/day) (finding) |
|  | 1092031000000100 | Ex-smoker amount unknown (finding) |
|  | 360900008 | Aggressive ex-smoker (finding) |
|  | 405746006 | Current non-smoker but past smoking history unknown (finding) |
|  | 735128000 | Ex-smoker for less than 1 year (finding) |
|  | 56578002 | Moderate smoker (20 or less per day) (finding) |
|  | 1092111000000100 | Ex-light smoker (1-9/day) (finding) |
|  | 1092131000000100 | Ex-trivial smoker (<1/day) (finding) |
|  | 1092041000000100 | Ex-very heavy smoker (40+/day) (finding) |
|  | 48031000119106 | Ex-smoker for more than 1 year (finding) |
|  | 492211000000104 | Ex-rolls own cigarettes |
|  | 160609009 | Ex-moderate smoker (10-19/day) (finding) |
|  | 492201000000101 | Ex-rolls own cigarettes |
|  | 1084051000000100 | Occasional tobacco smoker (finding) |
|  | 160608001 | Ex-light smoker (1-9/day) (finding) |
|  | 160611000 | Ex-very heavy smoker (40+/day) (finding) |
|  | 160615009 | Ex-smoker - amount unknown (finding) |
|  | 707381000000107 | Recently stopped smoking |
|  | 487391000000101 | Ex-cigarette smoker |
|  | 160610004 | Ex-heavy smoker (20-39/day) (finding) |
|  | 485971000000109 | Ex-cigarette smoker |
|  | 160607006 | Ex-trivial smoker (<1/day) (finding) |

Note: intolerant/tolerant ex-smokers, non-smokers due to personal/ religious/ pregnancy/ medical reasons, codes for date and time of stopping smoking have not been used in this classification

*Alcohol*

|  | **code** | **term** |
| --- | --- | --- |
|  | 228274009 | Teatotaller |
|  | 137953007 | Lifetime non drinker |
|  | 783261004 | Lifetime non drinker |
|  | 160579004 | Stopped drinking alcohol |
|  | 82581004 | Ex-drinker |
|  | 160583004 | Ex-light drinker - (1-2u/day) |
|  | 160585006 | Ex-heavy drinker - (7-9u/day) |
|  | 160587003 | Ex-very heavy drinker - greater than 9 units/day |
|  | 160582009 | Ex-trivial drinker - less than 1 unit/day |
|  | 286857004 | Ex-problem drinker |
|  | 160584005 | Ex-moderate drinker - (3-6u/d) |
|  | 105542008 | Non - drinker |

**Prescriptions**

| **ATC code** | **BNF chapter**  **code** | **Class of drugs** |
| --- | --- | --- |
| A02BC | 0103 | Antacids (Proton pump inhibitors+H2 receptor inhibitors) |
|  | 0101 | Other antacids |
| J01CA, J01CE,  J01FA, J01MA,  J01EB | 0501 | Antibiotics |
| C03CA | 0202 | Diuretics |
| N05BA, N05CF | 0401 | Anxiolytics |
|  | 0402 | Antipsychotics |
| M01AE, M01AB | 1001 | NSAIDs |
| R05DA, N02BE,  N02AX, N02AA | 0407 | Opioids, opium alkaloids (cough suppressants), and Paracetamol |
| H02AB | 0603 | Steroids |
| A12BA | 0902 | Supplements (Potassium) |
| A06AD, A03FA | 0106 | Laxatives |
| G04CA | 070401 | Alpha-adrenoreceptor antagonists |
