# Supplementary material
Source: Research Square preprint supplement (doi:10.21203/rs.3.rs-9516451/v1)
Supplement: Supplementary file 3 [file e2b3289d0ab0ac4c9fc629bb.docx]

| **Variable** | **Data availability**  **- RDC dataset** | **Data availability**  **-WSIC** | **Source -WSIC** |
| --- | --- | --- | --- |
| Patient Fitness – ECOG Performance status (EFI on WSIC compared as proxy parameter) ***** | ~1.6% | ~85%(EFI) | Derived from  coded GP data |
| Deprivation index | Not available | ~85% | Linked to Post  code |
| Smoking status | ~1.5% | ~85% | Structured data |
| Alcohol status | ~2.1% | ~82% | Structured data |
| Comorbidities | ~1.0% | ~72% | Structured GP diagnostic codes |
| Primary care visits  prior to referral | ~60.1% (no clear  timelines) | ~84%  (Time-series) | Derived from  Coded GP data |
| Referral criteria | Abnormal blood tests-Not available | Abnormal test results+ frequency | SNOMED CT  codes |
| Prescriptions history | Not available | Specific drug prescriptions +frequency | BNF codes |
| Cancer subtypes | 88% | 100% | SNOMED CT cluster id |

Table B.1: **Comparison of completeness between Chelsea and Westminster RDC dataset and linked records on WSIC**. The table summarises availability of demographic, clinical, and healthcare utilisation variables across data sources.

*Although The Electronic Frailty Index (EFI) derived from primary care records and Performance status are not equivalent variables, we are proposing it to be used as an alternative measure of patients’ fitness considering the absence of information on Performance status.

| Ethnicity  category | No. of patients (n=2356) | Language  distribution | No. of patients (n=2356) |
| --- | --- | --- | --- |
| British | 688(29.2%) | English | 1108(47.0%) |
| Irish | 52(2.2%) | Punjabi | 66(2.8%) |
| Any other white background | 368(15.6%) | Arabic | 45(1.9%) |
| Indian | 259(11.0%) | Hindi | 31(1.3%) |
| Pakistani | 50(2.1%) | Gujarati | 29(1.2%) |
| Chinese | 30(1.3%) | Polish | 28(1.2%) |
| Any other Asian background | 146(6.2%) | Urdu | 28(1.2%) |
| African | 70(3.0%) | Other languages | 204(8.6%) |
| Caribbean | 58(2.5%) | Not available | 817(34.6%) |
| Any other black background | 37(1.6%) |  |  |
| Mixed background | 65(2.7%) |  |  |
| Any other ethnic group | 114(4.8%) |  |  |
| Not available | 419(17.8%) |  |  |

Table B.2: Distribution of **ethnicity and preferred language** of the cohort (n = 2,356). Ethnicity and language categories are reported as recorded at referral; languages with proportions <1% are grouped under “Other languages”. ***Source: WSIC dataset***

| IMD decile | IMD quintile | No. of patients (n=2356) | EFI  category | No. of patients  (n= 2356) |
| --- | --- | --- | --- | --- |
| 1-2 | 1st (most deprived) | 213(9.0%) | Fit | 685(29.1%) |
| 3-4 | 2nd | 599(25.4%) | Mild | 475(20.2%) |
| 5-6 | 3rd | 560(23.8%) | Moderate | 449(19.1%) |
| 7-8 | 4th | 439(18.6%) | Severe | 374(15.9%) |
| 9-10 | 5th (least deprived) | 223(9.5%) | Not available | 373(15.8%) |
| Not available | | 322(13.7%) |  |  |

Table B.3: **Socioeconomic status and frailty** of the cohort based on Index of Multiple Deprivation (IMD) and Electronic Frailty Index (EFI) categories (n = 2,356). IMD is presented as deciles grouped into quintiles, with lower values indicating greater deprivation. ***Source: WSIC dataset***

| Frequent Comorbidities | No. of patients |
| --- | --- |
| Hypertension | 75(4.5%) |
| Non-diabetic hyperglycaemia | 71(4.2%) |
| Diabetes and Hypertension | 60(3.5%) |
| Anxiety | 56(3.3%) |
| Depression and Anxiety | 54(3.1%) |
| Diabetes | 50(2.9%) |
| Depression | 48(2.8%) |
| Hypertension and Non-diabetic hyperglycaemia | 38(2.2%) |
| Hypothyroidism | 36(2.1%) |
| Asthma | 22(1.3%) |
| Comorbidity count | **No. of patients (n=2356)** |
| 0 | 370(18.3%) |
| 1 | 409(20.2%) |
| 2 | 381(18.8%) |
| 3 | 308(15.2%) |
| 4 | 178(8.8%) |
| 5+ | 375(18.5%) |

Table B.4: **Prevalent comorbidities and overall comorbidity burden** in the cohort (n = 2,356). Frequently recorded comorbid conditions and common multimorbidity combinations (>1% prevalence) are shown, alongside the distribution of total comorbidity counts per patient**. *Source: WSIC dataset***

| Alcohol status | No. of patients (n=2356) | Smoking status | No. of patients (n=2356) |
| --- | --- | --- | --- |
| Lifetime non-drinker | 16(0.7%) | Lifetime never-smoker | 1144(48.5%) |
| Current non- drinker | 183(7.8%) | Current non- smoker | 543(23.0%) |
| Current drinker | 1700(72.2%) | Current smoker | 346(14.7%) |
| Not available | 457(19.4%) | Not available | 323(13.7%) |
| *Alcohol intake categories* |  | ***Cigarette consumption categories*** |  |
| Trivial (<1unit/week) | 842(44.7%) | Trivial (<1cig/day) | 17(1.9%) |
| Light (1-2 units/week) | 292(15.5%) | Light (1-9 cig/day) | 220 (24.7%) |
| Moderate (3-6 units/ week) | 251(13.3%) | Moderate (10-19 cig/day) | 201(22.6%) |
| Heavy (7-9 units/week) | 368(19.5%) | Heavy (>20 cig/day) | 79(8.9%) |
| Not available | 130(6.9%) | Not available | 372(41.8%) |

Table B.5: **Alcohol consumption and smoking status** of the cohort (n = 2,356). Alcohol intake and cigarette consumption are reported using standard categorical groupings derived from primary care records**. *Source: WSIC dataset***

| Symptoms  (RDC dataset) | Number of patients | Symptoms  (WSIC dataset) | Number of patients |
| --- | --- | --- | --- |
| Unexplained weight loss | 1266(37.8%) | Weight loss (Snomed CT) +  Measured weight loss | 1146(9.9%) |
| Fatigue/malaise | 296(8.8%) | Fatigue/malaise | 189(3.2%) |
| Abnormal laboratory findings | 234(7.0%) | Abnormal laboratory finding | 1678(28.0%) |
| Loss of appetite | 190(5.7%) | Loss of appetite | 267(4.5%) |
| Vague abdominal pain | 152(4.5%) | Abdominal pain | 201(3.4%) |
| Anaemia | 147(4.4%) | Anaemia | 764(12.7%) |
| Nausea/vomiting | 56(1.7%) | Nausea/vomiting | 49(0.8%) |
| - | - | Altered bowel habits (diarrhoea/constipation) | 74(1.2%) |
| Bloating | 64(1.9%) | Bloating | 26(0.4%) |
| Progressive pain | 65(1.9%) | Pain (other than abdominal/ chest) | 751(12.5%) |
| GP gut feeling | 18(0.5%) | - | - |
| Unexplained breathlessness | 27(0.8%) | Breathlessness | 275(4.6%) |
| - | - | Cough | 244(4.1%) |
| - | - | Chest pain | 93(1.6%) |
| Jaundice | 0 | Jaundice | 172(2.9%) |
| Unexplained thromboembolism | <5(0.1%) | Unprovoked deep vein thrombosis | <5(0.0%) |
| Abnormal radiological findings | 59(1.8%) | - | - |
| Other symptoms | 765(22.8%) | Other symptoms | 63 |

Table B.6: Comparison of **the non-specific symptoms** identified in Chelsea and Westminster **RDC dataset** to the ones detected directly from the primary care **linked records on WSIC**, starting at 24months prior to referral. Patients can present with multiple symptoms.

| **Cancer subtype** | **RDC dataset**  **(n= 74)** | **WSIC dataset**  **(n= 75)** |
| --- | --- | --- |
| Lymphoma | 11(14.8%) | 12(16.0%) |
| Haematological | 5(6.7%) | 10(13.3%) |
| Urological | 11(14.8%) | 11(14.6%) |
| Lung | 7(9.4%) | 7(9.3%) |
| Metastatic cancer of unknown origin (MUO) | 9(12.1%) | 7(9.3%) |
| HPB (Hepato-Pancreatobiliary) | 7(9.4%) | 8(10.6%) |
| Skin | <5(1.3%) | 5(6.6%) |
| Breast | 7(9.4%) | <5(5.3%) |
| Colon | <5(2.7%) | <5(4.0%) |
| Gynaecological | <5(2.7%) | <5(4.0%) |
| Anal | <5(1.3%) | <5(1.3%) |
| Gastric | 0 | <5(1.3%) |
| Head and neck | 0 | <5(1.3%) |
| Oesophageal | <5(1.3%) | <5(1.3%) |
| Sarcoma | <5(1.3%) | <5(1.3%) |
| Retroperitoneal | 0 | <5(1.3%) |
| Site not documented | 9(12.1%) | 0 |

Table B.7: Distribution of **cancer subtypes** among patients diagnosed with cancer following RDC referral, comparing **RDC and WSIC linked datasets**. Cancer subtypes are ordered by frequency.

|  | Non-cancerous diagnosis | Count of patients |
| --- | --- | --- |
| 1 | Non-diabetic hyperglycaemia | 70 |
| 2 | Gastritis | 69 |
| 3 | Iron deficiency anaemia | 51 |
| 4 | Type 2 diabetes mellitus | 51 |
| 5 | Hiatal hernia | 48 |
| 6 | Diabetic retinopathy | 44 |
| 7 | Diverticular disease | 42 |
| 8 | Pressure ulcer | 35 |
| 9 | Anaemia | 34 |
| 10 | Corns and callus | 32 |
| 11 | Surgical wound | 25 |
| 12 | Hypertrophy of nail | 24 |
| 13 | Essential hypertension | 22 |
| 14 | Polyp of colon | 22 |
| 15 | Cobalamin deficiency | 21 |
| 16 | Oesophagitis | 21 |
| 17 | Lower respiratory tract infection | 20 |
| 18 | Osteoporosis | 20 |
| 19 | Vitamin D deficiency | 19 |
| 20 | Haemorrhoids | 18 |
| 21 | Depression | 17 |
| 22 | Polymyalgia rheumatica | 17 |
| 23 | UTI - Urinary tract infection | 17 |
| 24 | Venous stasis ulcer of leg | 16 |
| 25 | Asthma | 15 |
| 26 | Atrial fibrillation | 15 |
| 27 | Barrett's oesophagus | 15 |
| 28 | Inguinal hernia | 14 |
| 29 | COPD - Chronic obstructive pulmonary disease | 13 |
| 30 | Gastrooesophageal reflux disease | 13 |
| 31 | Heart failure | 13 |

Table B.8: **Most common non‑cancer diagnoses recorded within 3 months of referral.** Number of patients with each SNOMED CT–coded diagnosis, ordered by decreasing frequency; diagnoses are grouped by SNOMED CT “disorder” codes. ***Source: WSIC dataset***

|  | **Cancer diagnosis (n=52)** | **No cancer diagnosis**  **(n=1525)** |  |
| --- | --- | --- | --- |
| **Symptom rate per patient-month** | Cancer vs no cancer | | ***p=0.012*** |
| ***6month window leading upto referral*** |  | |  |
| 18-24 | 0.10 | 0.20 | ***reference*** |
| 12-17 | 0.14 | 0.22 | ***p=0.013*** |
| 6-11 | 0.16 | 0.22 | ***p=0.001*** |
| 0-5 | 0.44 | 0.40 | ***p<0.001*** |
|  | **Cancer diagnosis (n=74)** | **No cancer diagnosis (n=1922)** |  |
| **GP visit rate per patient-month** | Cancer vs no cancer | | ***p=0.563*** |
| ***6month window leading upto referral*** |  | |  |
| 18-24 | 2.5 | 2.5 | ***reference*** |
| 12-17 | 2.7 | 2.8 | ***p<0.001*** |
| 6-11 | 2.8 | 2.9 | ***p<0.001*** |
| 0-5 | 3.4 | 3.3 | ***p<0.001*** |

Table B.9: Comparison of **symptom rates and primary care consultation rates** in the 24 months preceding RDC referral between cancer and non‑cancer cases. Symptom and GP visit rates are expressed per patient‑month and were estimated using a Poisson regression model, with the 18–24‑month window used as the reference category. Rates are summarised across successive 6‑month windows (18–24, 12–17, 6–11, and 0–5 months before referral), and p‑values reflect the between‑group differences for each interval. ***Source: WSIC dataset***

|  | **Cancer diagnosis (n=71)** | **No cancer diagnosis (n=1894)** |  |
| --- | --- | --- | --- |
| **Blood Test request counts** |  |  |  |
| Mean (sd, range) | 29.8(19.0, 3-96) | 33.8(14.2, 2-341) | ***p = 0.091*** |
| Median [IQR] | 26[17-34] | 30[20-42] |  |
| **Blood Test request rate per patient-month** | Cancer vs no cancer | | ***p<0.001*** |
| ***6month window leading upto referral*** |  | |  |
| 18-24 | 0.5 | 0.7 | ***reference*** |
| 12-17 | 0.6 | 0.8 | ***p<0.001*** |
| 6-11 | 0.7 | 0.8 | ***p<0.001*** |
| 0-5 | 1.6 | 1.7 | ***p<0.001*** |
| **Abnormal test result counts** | **Cancer diagnosis (n=63)** | **No cancer diagnosis (n=1677)** |  |
| Mean (sd, range) | 3.6(1.8,1-8) | 3(1.7,1-10) | ***p=0.011*** |
| Median [IQR] | 3[2-5] | 3[2-4] |  |
| **Abnormal Blood Test rate per patient-month** | Cancer vs no cancer | | ***p=0.083*** |
| ***6month window leading upto referral*** |  | |  |
| 18-24 | 0.2 | 0.2 | ***reference*** |
| 12-17 | 0.2 | 0.3 | ***p<0.001*** |
| 6-11 | 0.3 | 0.3 | ***p<0.001*** |
| 0-5 | 0.8 | 0.6 | ***p<0.001*** |

Table B.10: Comparison of **blood test requests and abnormal results** in the 24 months preceding RDC referral for cancerand noncancer cases. Tests were selected based on prior literature. Each blood test request was counted as a separate event, even when multiple tests were performed on the same day for a given patient. Overall counts are summarised using mean, SD, median, and IQR. Blood test request and abnormal‑result rates per patient‑month were estimated using a Poisson regression model, with the 18–24‑month window set as the reference, and reported across successive 6‑month windows (18–24, 12–17, 6–11, and 0–5 months pre‑referral). ***Source: WSIC dataset***

| **Class of drugs** | **Cancer cases (%)** | **Non-cancer cases (%)** | **Absolute risk difference (%)** |
| --- | --- | --- | --- |
| Antacids (PPI+H2 receptor inhibitors) | 22.9 | 17.6 | 5.3 |
| Other antacids | 2.0 | 2.2 | -0.2 |
| Antibiotics | 36.1 | 34.1 | 2.1 |
| Diuretics | 4.4 | 2.7 | 1.7 |
| Anxiolytics | 1.0 | 5.6 | -4.6 |
| Antipsychotics | 0 | 0.4 | -0.4 |
| NSAIDs | 6.8 | 5.6 | 1.2 |
| Opium alkaloids and Paracetamol | 15.6 | 17.0 | -1.4 |
| Steroids | 1.0 | 3.5 | -2.5 |
| Supplements (Potassium) | 0 | 0.3 | -0.3 |
| Laxatives | 10.2 | 10.3 | -0.1 |
| Alpha-adrenoreceptor antagonists | 0 | 0.8 | -0.8 |

#### Table B.11: Comparison of **incident prescribing across 12 drug classes** (**Cancer n=53, Non‑cancer n=1396)** in the 24 months prior to RDC referral between cancer and non‑cancer cases. Incident prescribing defined as the first recorded prescription for each drug class in WSIC, with complete lifetime history available for all patients. Absolute risk differences represent the difference in the proportion of patients receiving at least one prescription in each drug class**.** Abbreviations: PPI,Proton pump inhibitors;NSAIDS, Non-Steroidal Anti-inflammatory drugs; **Source: WSIC dataset**

| **Specific Prescriptions (medications of interest)** | **Cancer diagnosis (n=74)** | **No cancer diagnosis (n=1947)** |  |
| --- | --- | --- | --- |
| **Polypharmacy by drug type** |  |  |  |
| Mean (sd, range) | 1.7(0.9,1-5) | 1.8(1.2,1-8) | ***p=0.130*** |
| Median [IQR] | 1[1-2] | 1[1-2] |  |
| 1 | 43(58.1%) | 1081(55.5%) |  |
| 2 | 16(21.6%) | 422(21.7%) |  |
| 3 | 12(16.2%) | 247(12.7%) |  |
| 4 | <5(2.7%) | 102(5.2%) |  |
| 5+ | <5(1.3%) | 95(4.8%) |  |
| **Prescription counts** |  |  |  |
| Mean (sd, range) | 2.6(2.4, 1-11) | 3.6(4.7,1-56) | ***p=0.001*** |
| Median [IQR] | 2[1-3] | 2[1-4] |  |
| 1-5 | 68(90.7%) | 1571(80.7%) |  |
| 6-10 | <5(5.3%) | 240(12.3%) |  |
| 11-15 | <5(4.0%) | 87(4.5%) |  |
| 16-20 | 0 | 25(1.3%) |  |
| 21+ | 0 | 24(1.2%) |  |
| **Prescription rate per patient-month** | Cancer vs no cancer | | ***p<0.001*** |
| ***6month window leading upto referral*** |  | |  |
| 18-24 | 0.2 | 0.2 | ***reference*** |
| 12-17 | 0.1 | 0.2 | ***p=0.001*** |
| 6-11 | 0.1 | 0.2 | ***p<0.001*** |
| 0-5 | 0.3 | 0.3 | ***p<0.001*** |

Table B.12: Comparison of p**olypharmacy patterns, total prescription counts, and prescription rates** between cancer (**n=74),** and non‑cancer (**n=1947)** cases in the 24 months preceding RDC referral. Polypharmacy is defined by the number of distinct drug classes prescribed. Prescription rates per patient‑month were estimated using a Poisson regression model, with the 18–24‑month window as the reference and summarised across successive 6‑month windows (18–24, 12–17, 6–11, and 0–5 months before referral). ***Source: WSIC dataset***

|  | **Cancer diagnosis** | **No cancer diagnosis** |  |
| --- | --- | --- | --- |
| **Age** | **No. of referrals (n=75)** | **No. of referrals (n=1976)** |  |
| Mean (sd, range) | 68(16.7, 23-93) | 64(16.3, 19-101) | ***p=0.038*** |
| Median [IQR] | 70[57.5-83] | 66[54.0-77.0] |  |
| **Age bands** |  |  | ***p=0.1094*** |
| 18-34 | <5(4.0%) | 120(6.1%) |  |
| 35-54 | 12(16.0%) | 401(20.3%) |  |
| 55-64 | 15(20.0%) | 396(20.0%) |  |
| 65-79 | 21(28.0%) | 718(36.3%) |  |
| >=80 | 24(32.0%) | 341(17.3%) |  |
| **Sex** | **No. of patients (n=74)** | **No. of patients (n=1947)** | ***p=1*** |
| Female | 43(58.1%) | 1132(58.1%) |  |
| Male | 31(41.9%) | 815(41.9%) |  |
| **EFI** |  |  | ***p=0.776*** |
| Fit | 27(36.5%) | 622(31.9%) |  |
| Mild | 17(23.0%) | 454(23.3%) |  |
| Moderate | 15(20.3%) | 432(22.2%) |  |
| Severe | 11(14.9%) | 361(18.5%) |  |
| Not available | 4(5.4%) | 78(4.0%) |  |
| **IMD quintile** | **No. of patients (n=74)** | **No. of patients (n=1947)** | ***p=0.489*** |
| 1st (most deprived) | 7(9.5%) | 201(10.3%) |  |
| 2nd | 28(37.8%) | 568(29.2%) |  |
| 3rd | 18(24.3%) | 539(27.7%) |  |
| 4th | 13(17.6%) | 423(21.7%) |  |
| 5th (least deprived) | 8(10.8%) | 213(10.9%) |  |
| Not available | 0 | 3(0.2%) |  |

Table B.13: Comparison of **demographic and socioeconomic characteristics** between patients diagnosed with cancer (n=74) and those without a cancer diagnosis (n=1947) following RDC referral. Continuous variables are summarised using means (SD) and medians (IQR), and categorical variables as counts and percentag**es. *Source: WSIC dataset***

|  | **Cancer diagnosis**  **(n=74)** | **No cancer diagnosis (n=1947)** |  |
| --- | --- | --- | --- |
| **Alcohol status** |  |  | ***p=0.541*** |
| Current drinker | 60(81.1%) | 1623(83.3%) |  |
| Ex-drinker | 5(6.7%) | 175(8.9%) |  |
| Never drinker | <5(1.4%) | 15(0.8%) |  |
| Not available | 8(10.8%) | 134(6.8%) |  |
| **Alcohol intake categories** |  |  | ***p=0.749*** |
| trivial | 27(47.4%) | 815(48.0%) |  |
| light | 8(14.0%) | 284(16.7%) |  |
| moderate | 7(12.2%) | 244(14.4%) |  |
| heavy | 15(26.3%) | 353(20.8%) |  |
| **Smoking status** |  |  | ***p=0.361*** |
| Current smoker | 15(20.2%) | 323(16.6%) |  |
| Current non- smoker | 22(29.7%) | 505(25.9%) |  |
| Never smoked | 35(47.3%) | 1098(56.3%) |  |
| Not available | 2(2.7%) | 21(1.0%) |  |
| **Cigarette consumption categories** |  |  | ***p=0.020*** |
| trivial | <5(8.1%) | 14(1.7%) |  |
| light | 5(13.5%) | 215(26.6%) |  |
| moderate | 7(18.9%) | 194(24.0%) |  |
| high | 5(13.5%) | 74(9.1%) |  |
| Unknown | 17(45.9%) | 331(40.9%) |  |
| **Comorbidities count** |  |  |  |
| Mean (sd, range) | 2.4(2.1,0-9) | 2.6(2.3,0-13) | ***p=0.604*** |
| Median [IQR] | 2[1-3] | 2[1-4] |  |
| 0 | 15(20.2%) | 355(18.2%) |  |
| 1 | 13(17.6%) | 396(20.3%) |  |
| 2 | 15(20.3%) | 366(18.8%) |  |
| 3 | 13(17.6%) | 295(15.1%) |  |
| 4 | 7(9.5%) | 171(8.8%) |  |
| 5+ | 11(14.9%) | 364(18.7%) |  |

Table B.14: Comparison of **lifestyle factors and comorbidity burden** between patients with and without a cancer diagnosis following RDC referral. Alcohol use, smoking status, and comorbidity counts are presented using categorical and summary measures**. *Source: WSIC dataset***
